# Supplementary material
Source: PubMed Central journal article supplement (PMC5778364)
Supplement: IAI.00645-17_zii999092275s3.pdf [file IAI.00645-17_zii999092275s3.pdf]

| <b>Assay ID</b>       | <b>Gene Name</b>     | <b>Exon location</b> |
|-----------------------|----------------------|----------------------|
| Mm.PT.58.21898136     | <i>Camp</i>          | 3-4                  |
| Mm.PT.58.13402117     | <i>Defb3</i>         | 1-2                  |
| Mm.PT.58.32778767     | <i>IL1a</i>          | 4-5                  |
| Mm.PT.58.41616450     | <i>IL1b</i>          | 3-4                  |
| Mm.PT.58.42076891     | <i>Cxcl1</i>         | 2-4                  |
| Mm.PT.58.10456839     | <i>Cxcl2</i>         | 2-4                  |
| Mm.PT.58.9186111      | <i>GM-CSF (CSF2)</i> | 2-3                  |
| Mm.PT.58.7976206.gs   | <i>G-CSF (CSF3)</i>  | 4-5                  |
| Mm.PT.58.10005566     | <i>IL6</i>           | 4-5                  |
| Mm.PT.58.44003402.gs  | <i>S100a8</i>        | 2-3                  |
| Mm.PT.58.10949783     | <i>Saa3</i>          | 2-3                  |
| Mm.PT.39a.22214843.gs | <i>Actb</i>          | 5-6                  |

**Table S2. Proprietary qPCR primers used to analyze gene expression in murine vaginal tissue.**
