# Supplementary material
Source: PubMed Central journal article supplement (PMC5778364)
Supplement: IAI.00645-17_zii999092275s4.pdf [file IAI.00645-17_zii999092275s4.pdf]

1 **SUPPLEMENTAL MATERIAL**

2

3 **Figure S1. Global differential gene expression induced over time following *C.***  
4 ***albicans* or PBS sham challenge of Reconstituted Vaginal Epithelium (RVE).** Three  
5 independent RVE were challenged with *C. albicans* or mock infected with PBS for 6 or  
6 24 h and differential gene expression ( $\geq$  2-fold change) was assessed by microarray  
7 analysis. Volcano plots depicting log<sub>2</sub> fold expression changes of genes (blue dotted  
8 lines) at  $p < 0.001$  (red dotted line) between **(A)** PBS treatment or **(B)** *C. albicans*  
9 infection between 6 and 24 h time points. **(C)** After adjusting for p-value and false  
10 discovery rate (fdr,  $p < 0.01$ ), Venn-diagram plot depicts absolute number of genes  
11 expressed between PBS sham (red) and *C. albicans* infection (green).

12

13 **Table S1. List of genes differentially expressed during *C. albicans* infection of**  
14 **vaginal epithelial cells.** All genes differentially expressed ( $\geq$  2-fold change) between *C.*  
15 *albicans* and mock challenge at 6 h and 24 h are listed. Fold changes are reported as  
16 the average from three independent RVE samples.

17

18 **Table S2. Proprietary qPCR primers used to analyze gene expression in murine**  
19 **vaginal tissue.**

20

21
