# Supplementary material
Source: PubMed Central journal article supplement (PMC5778364)

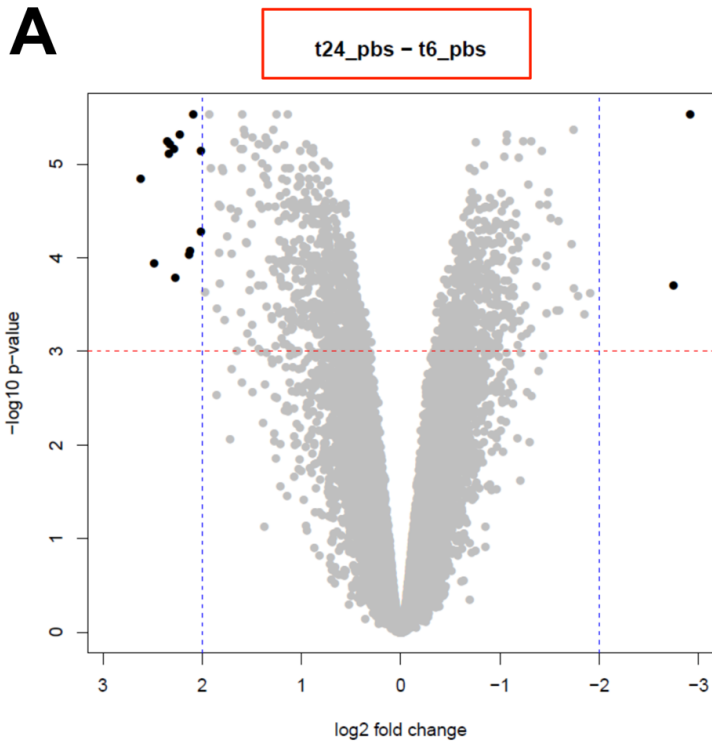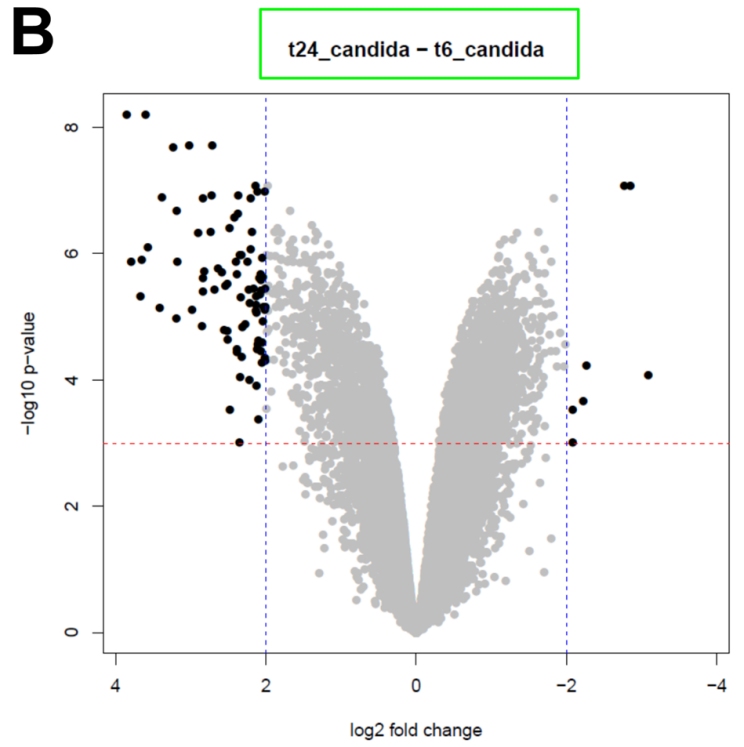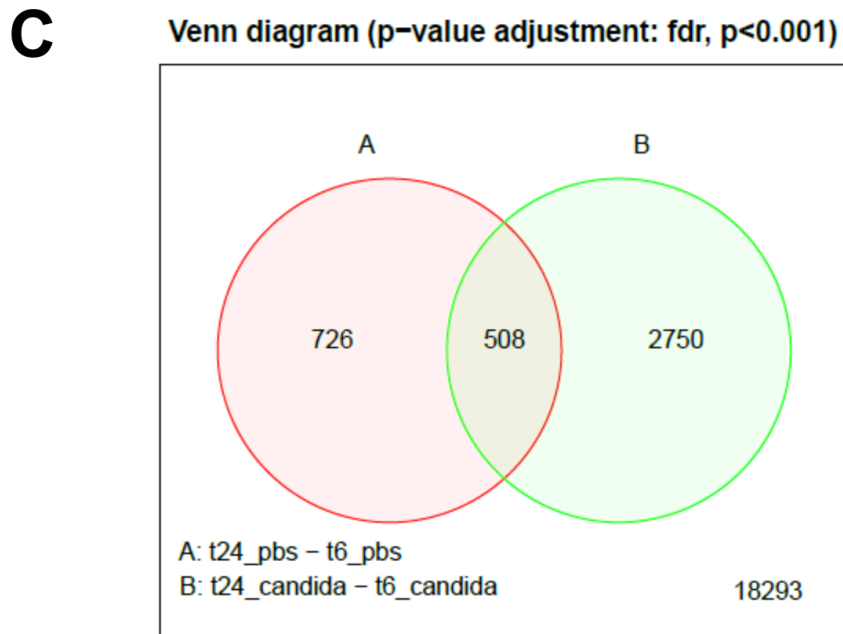

Supplement: IAI.00645-17_zii999092275s1.pdf [file IAI.00645-17_zii999092275s1.pdf]
